# Supplementary material for: The ubiquitin conjugase Rad6 mediates ribosome pausing during oxidative stress
Source: PubMed Central journal article supplement (PMC10755677; doi:10.1016/j.celrep.2023.113359), 2023-11-02
Supplement: NIHMS1948193-supplement-1.pdf [file NIHMS1948193-supplement-1.pdf]

**Cell Reports, Volume 42**

**Supplemental information**

**The ubiquitin conjugase Rad6 mediates  
ribosome pausing during oxidative stress**

**Sezen Meydan, Géssica C. Barros, Vanessa Simões, Lana Harley, Blanche K. Cizubu, Nicholas R. Gydosh, and Gustavo M. Silva**

**Figure S1**

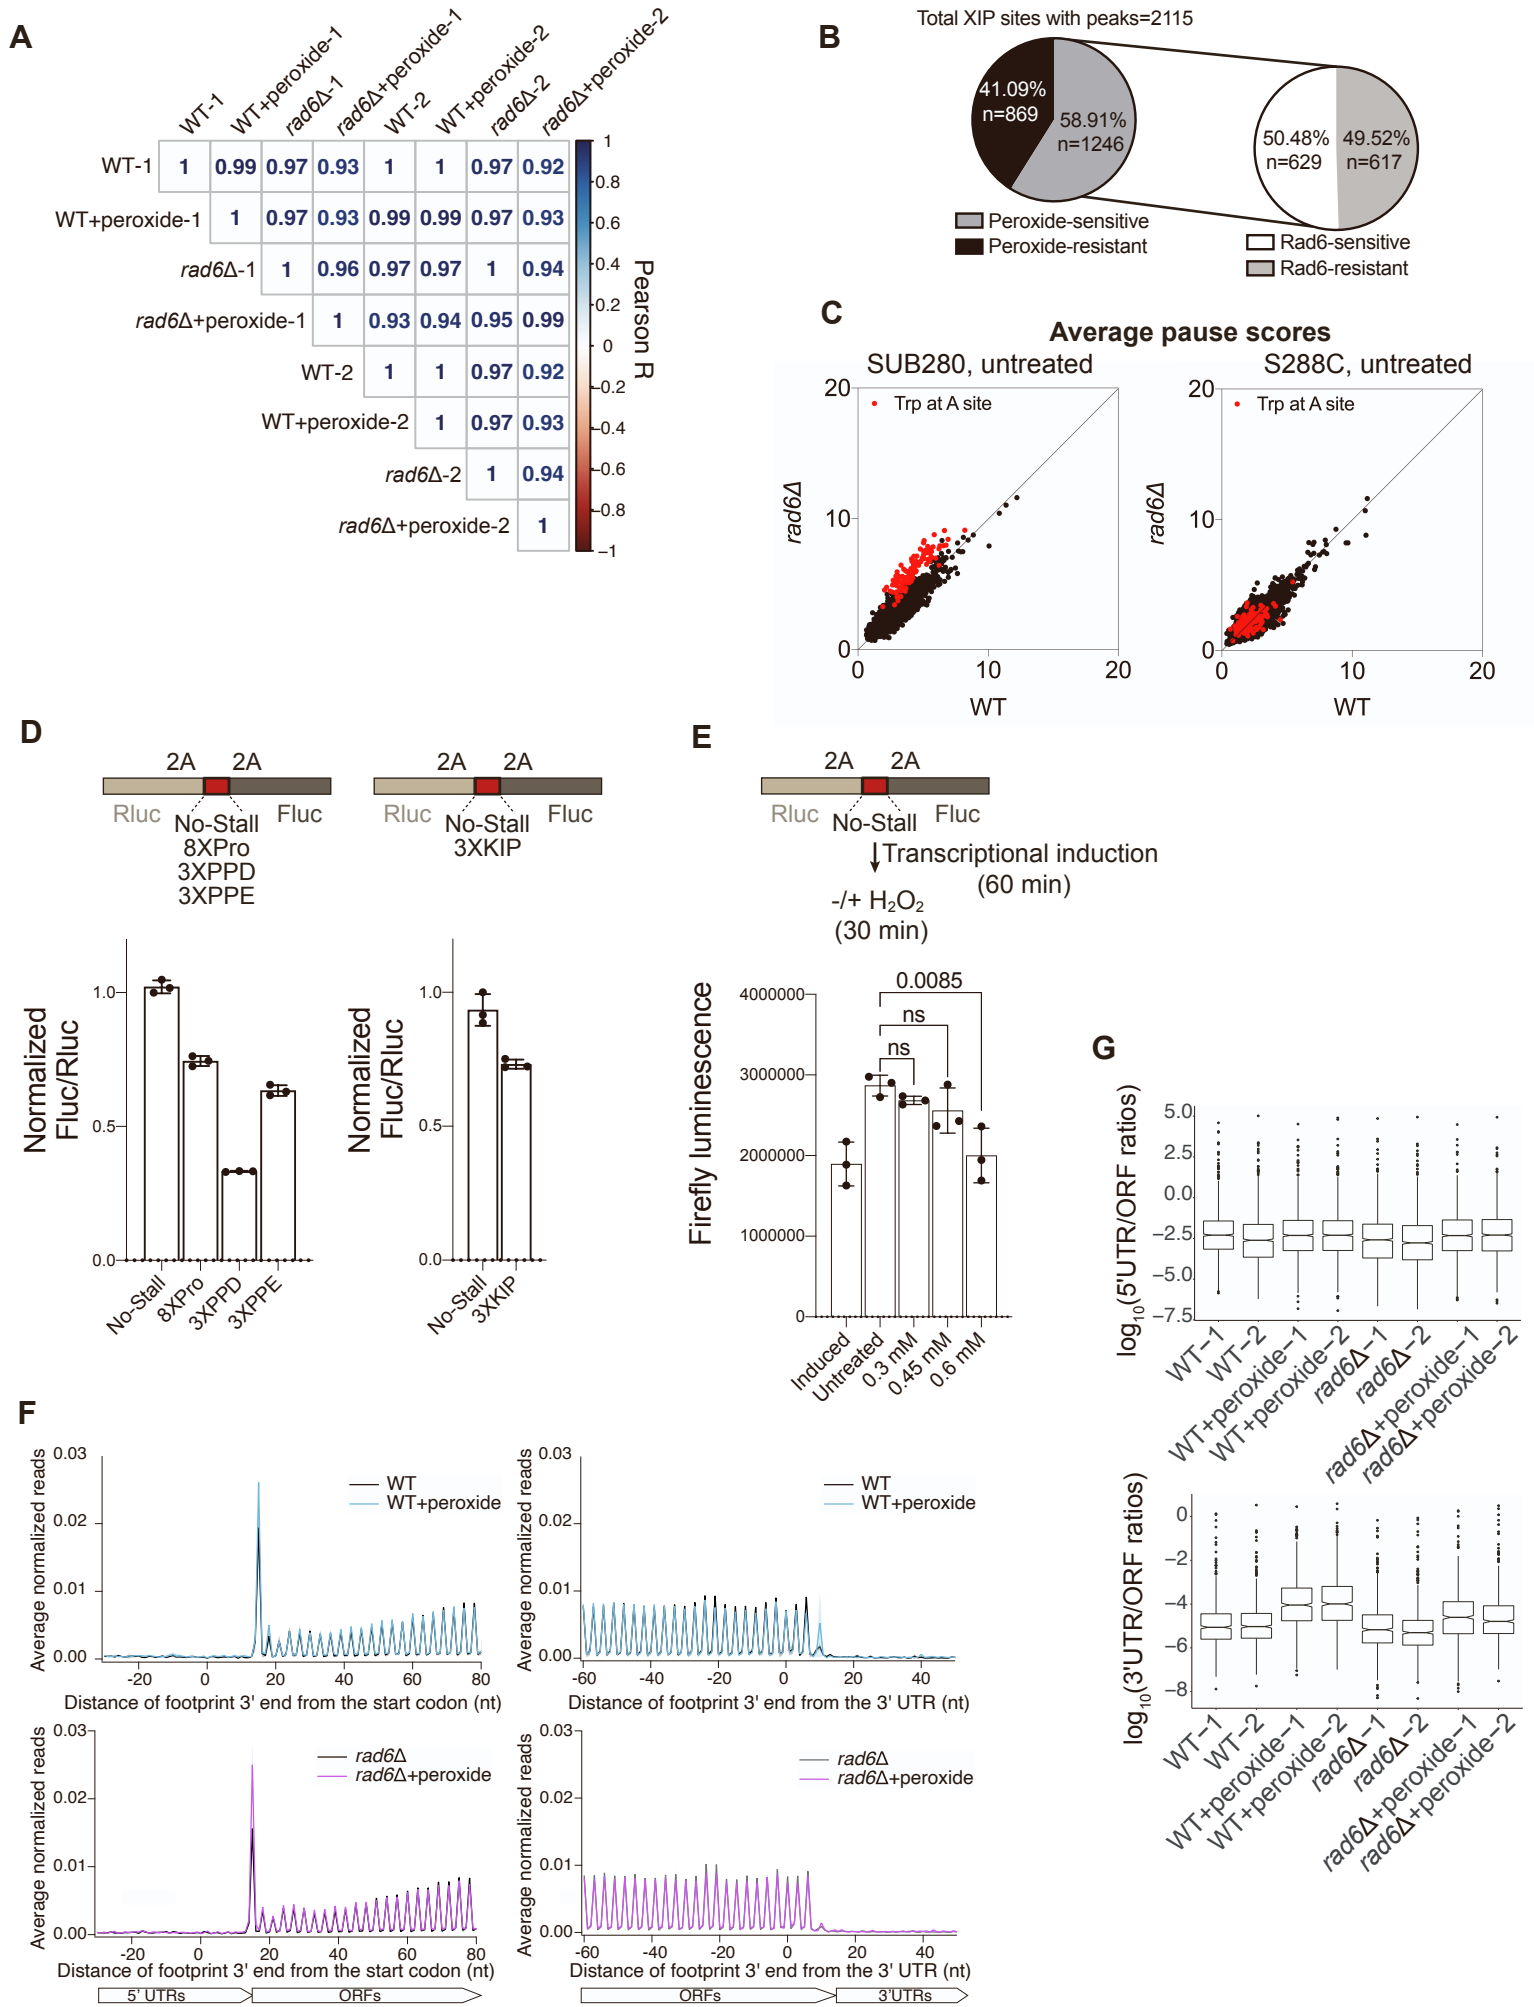

**Figure S1. Global analysis of translation in WT and *rad6Δ* cells. Related to Figures 1 and 2.**

**(A)** Correlation matrix of all RNA-seq data from WT and *rad6Δ* ± H<sub>2</sub>O<sub>2</sub> (peroxide) cells, computed using raw counts for each gene. This shows the reproducibility of replicates and extent of change between different conditions. The color scale (right) corresponds to the color of the text within each square.

**(B)** Pie charts showing the sensitivity of XIP pausing to peroxide and the presence of Rad6. For this analysis, Ribo-seq pause scores corresponding to n=9221 XIP sites in the genome were evaluated. Among these, 2115 XIP sites have >0 reads in all 8 samples (WT, WT+peroxide, *rad6Δ* and *rad6Δ*+peroxide in 2 replicates). Within this group, the XIP sites were considered as “peroxide-sensitive” if the pause score at the site was increased by >2 fold (n=1246) upon peroxide in WT cells and the remaining sites (n=869) were considered as “peroxide-resistant”. Within the peroxide-sensitive XIP sites, those that have pause scores decreased >2 fold in *rad6Δ* cells were evaluated as “Rad6-sensitive” (n=629) and the remainder of the sites were grouped as “Rad6-resistant” (n=617).

**(C)** Average pause scores of 6267 tri-amino acid motifs plotted for untreated WT and *rad6Δ* cells in either SUB280 (left) or S288C (right) background. Motifs with Trp at the A-site are indicated in red. Note that Trp stalling in *rad6Δ* cells is specific to the SUB280 strain.

**(D)** Schematic of reporter experiments that test motifs with high pause scores in Ribo-seq data (top). As expected, Fluc/Rluc values for stall-inducing sequences, relative to the reporter without any stall sequence (No-Stall), show that stalling motifs cause 20-70% reduction in Fluc and therefore confirm ribosome rescue or drop-off prior to the ribosome

reaching Fluc (bottom). Data from 3 replicates are shown. Error bar indicates mean  $\pm$  standard deviation. Data are for WT cells.

**(E)** Schematic of reporter experiments in the presence of peroxide (top). Unlike luciferase assays elsewhere, this assay includes treatment with peroxide, which takes place for 30 min once transcription of the reporter is induced for 60 min. The data (bottom) show firefly luminescence (only) in untreated cells and cells treated with 0.3, 0.45 and 0.6 mM of peroxide. This value increases during the induction phase (induced vs untreated bars) as the cells move toward a steady state. In peroxide-treated cells, the luminescence decreases and is most severe at 0.6 mM (red). This peroxide-dependent baseline makes it difficult to assay additional effects due to stall-inducing sequences. Data from 3 replicates are shown. Error bar indicates mean  $\pm$  standard deviation. Data are for WT cells.

**(F)** Metagene analysis showing the average normalized Ribo-seq reads mapped to genes that were aligned by their respective start codon (left panels) or stop codon (right panels) of WT (top) and *rad6* $\Delta$  (bottom) cells  $\pm$  peroxide. Average of two replicates  $\pm$  standard deviation (shaded) is plotted. Loss of Rad6 does not change the overall translation trends.

**(G)** Box plots showing the distribution of 5'UTR/ORF (top) or 3'UTR/ORF (bottom) ratios for WT and *rad6* $\Delta$  cells  $\pm$  peroxide. 5'UTR and 3'UTR translation slightly increases with peroxide treatment, and these trends are similar in *rad6* $\Delta$  cells. The boxes represent the interquartile range (IQR), and the horizontal line indicates the median. Whiskers show 1.5\*IQR and notches indicate  $1.58 \cdot \text{IQR} / \sqrt{n}$ .

Figure S2

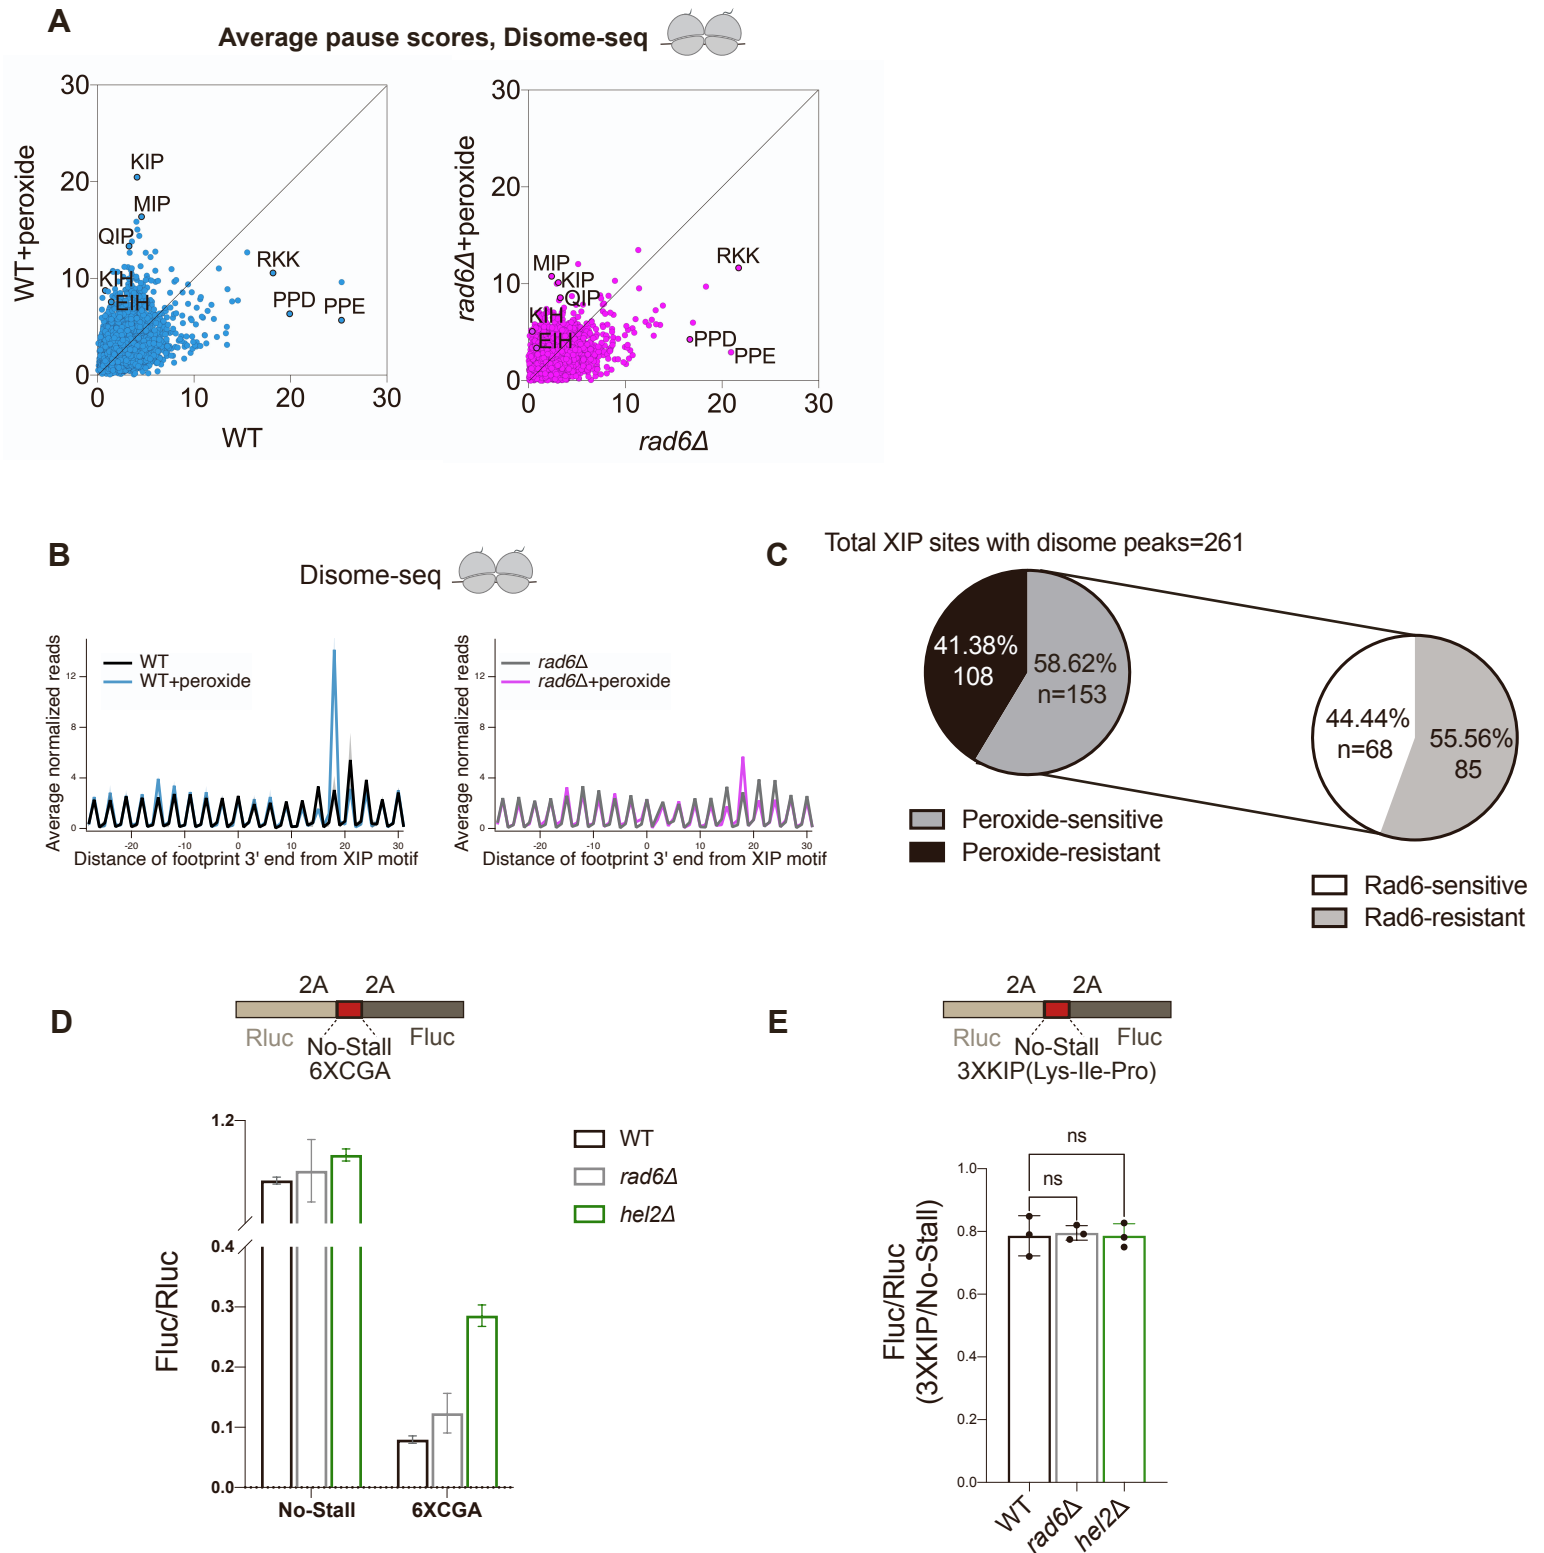

**Figure S2. Disome-seq signatures of WT and *rad6Δ* cells and detailed RQC reporter results. Related to Figures 1 and 3.**

**(A)** Average Disome-seq pause scores of 6267 tri-amino acid motifs plotted for WT and *rad6Δ* cells  $\pm$  peroxide. The redox pausing signatures are similar to Ribo-seq motifs. Average of two replicates is plotted. Motifs with Trp codons are excluded from this graph.

**(B)** Average normalized Disome-seq reads mapped to genes aligned by their respective XIP motifs in WT (left) or *rad6Δ* (right) cells. Note that the XIP pausing by disomes is diminished in *rad6Δ* cells, consistent with results for Ribo-seq experiments. Average of two replicates  $\pm$  standard deviation (shaded) is plotted for WT data and a single replicate is shown for *rad6Δ* cells.

**(C)** Pie charts showing the sensitivity of XIP disome pausing to peroxide and the presence of Rad6. For this analysis, Disome-seq pause scores corresponding to n=9221 XIP sites in the genome were evaluated. Among these, 261 XIP sites have >0 reads in all 6 samples (WT, WT+peroxide in duplicates, *rad6Δ* and *rad6Δ*+peroxide). Within this group, the XIP sites were considered as “peroxide-sensitive” if the pause score at the site was increased by >2 fold (n=153) upon peroxide in WT cells and the remaining sites (n=108) were considered as “peroxide-resistant”. Within the peroxide-sensitive XIP sites, those that have pause scores decreased >2 fold in *rad6Δ* cells were evaluated as “Rad6-sensitive” (n=68) and the remainder of the sites were grouped as “Rad6-resistant” (n=85).

**(D)** Fluc/Rluc ratio of the dual luciferase reporter with 6xCGA shows that deletion of *HEL2* increases bypassing of the 6xCGA sequence, as anticipated. Data from 3 replicates are shown. Error bar indicates mean  $\pm$  standard deviation. Loss of the *RAD6* gene, in contrast, does not affect this reporter in a major way.

(E) Schematic for the Renilla-Firefly reporter construct used to measure ribosome rescue at a redox pausing motif (top, 3xKIP). The Fluc/Rluc ratio is expected to become lower when ribosomes dissociate from the mRNA (i.e. via ribosome rescue) after translating the Rluc sequence but prior to reaching the Fluc sequence. The ratio of the Fluc/Rluc value for the 3XKIP reporter compared to a No-Stall reporter is shown (bottom). Deletion of *RAD6* or *HEL2* does not appear to affect ribosome rescue. The significance is assessed by one-way Anova test. ns = not significant. Data from 3 replicates are shown. Error bar indicates mean  $\pm$  standard deviation.

Figure S3

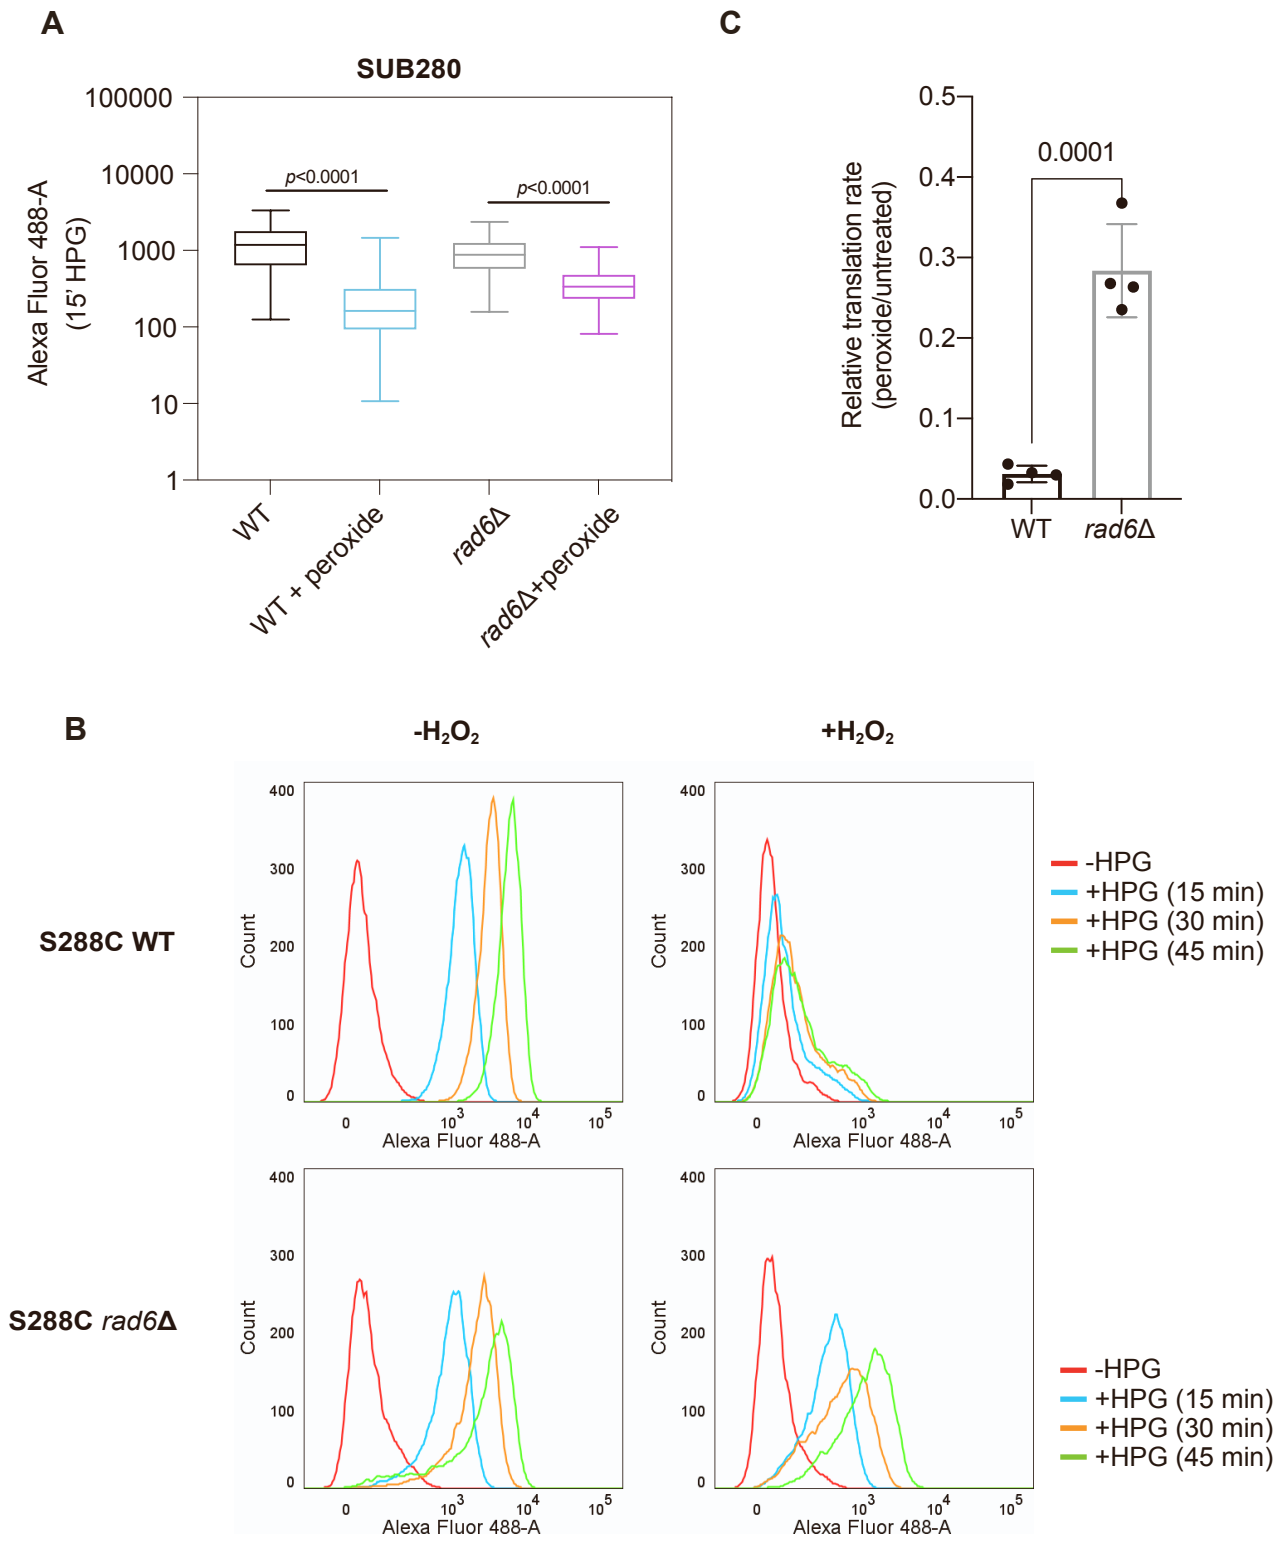



**Figure S3. Translation rate assays in WT and *rad6Δ* cells. Related to Figure 4.**

**(A)** Raw fluorescence data for HPG incorporation during 15 minutes show that peroxide-induced translation inhibition is lower in SUB280 *rad6Δ* cells compared to WT. The statistical significance is assessed by comparing the means via two-way ANOVA test. The line in the middle of each box is plotted at the median and whiskers show the minimum and maximum values.

**(B)** Histograms generated from HPG incorporation assay showing the number of cells (y-axis) and fluorescence measurements (x-axis) at indicated time points of HPG incubation (15-45 minutes). S288C WT cells exhibit decreased HPG incorporation in the presence of peroxide (top panel). In contrast, HPG incorporation in *rad6Δ* cells is affected less by the peroxide treatment (bottom panel). These data show the responses observed in the SUB280 strain are consistent in the S288C strain.

**(C)** Quantification of HPG incorporation during peroxide treatment is shown as a normalized rate for HPG incorporation in treated vs untreated S288C cells. The translation rates were calculated by fitting the mean fluorescence values to a linear regression as a function of time. Significance is determined by two-tailed unpaired t-test. Data from 4 replicates are shown. Error bar indicates mean  $\pm$  standard deviation. These data show the responses observed in the SUB280 strain are consistent in the S288C strain.

Figure S4

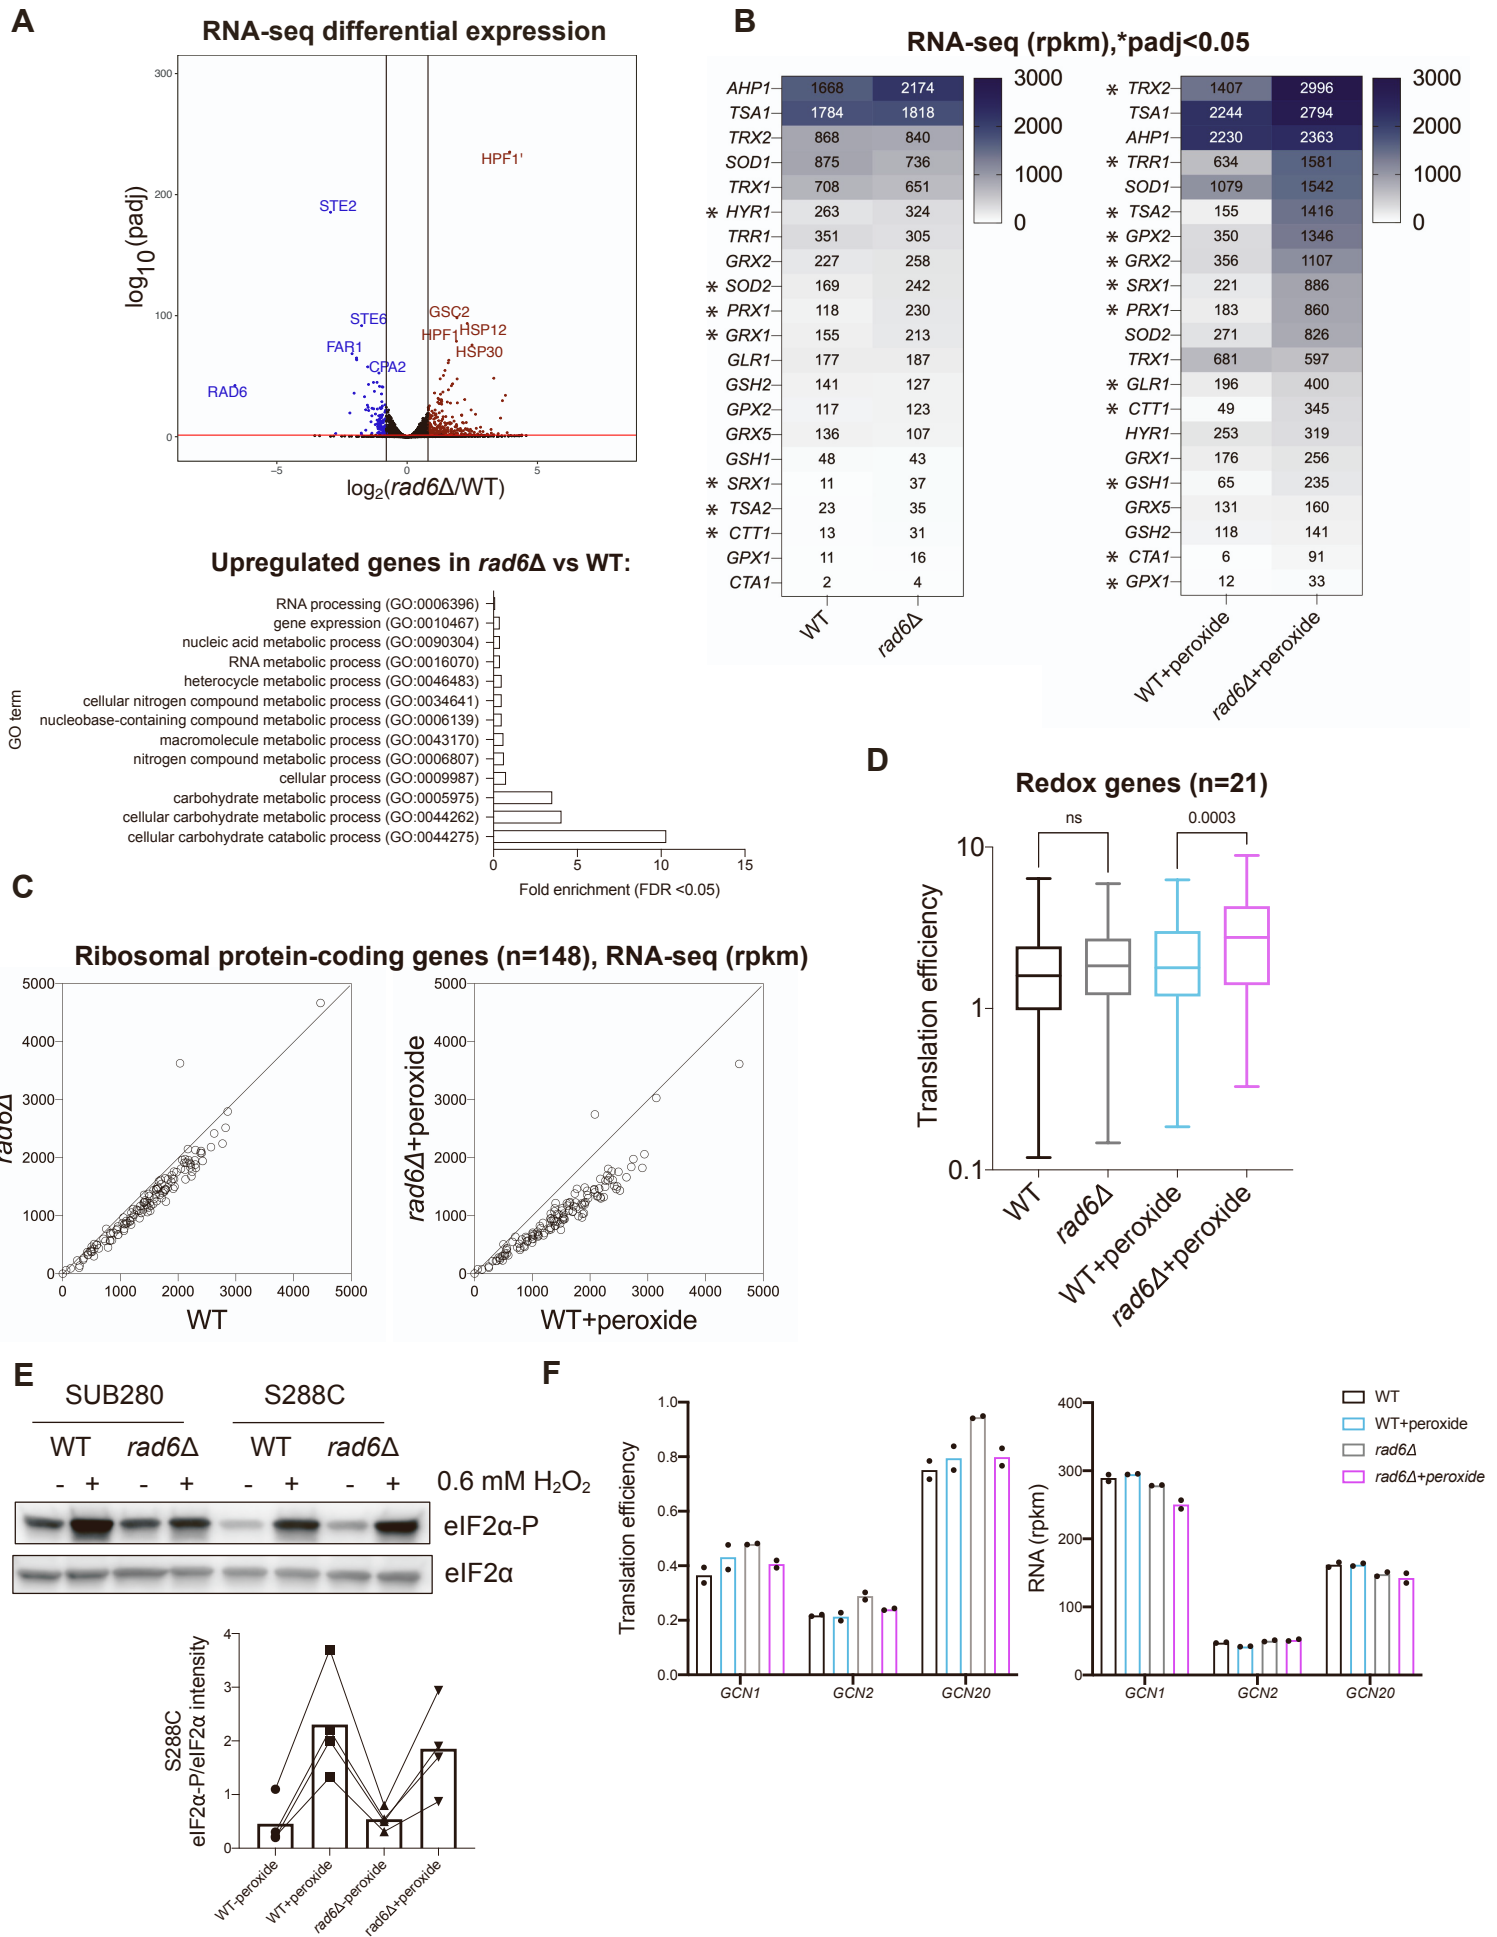

**Figure S4. Differential expression analysis of WT and *rad6Δ* cells. Related to Figure 5.**

**(A)** Volcano plot showing the differential RNA expression in *rad6Δ* versus WT cells. Genes that are significantly upregulated ( $\log_2$ Fold Change > 0.8,  $p_{adj}$  < 0.05) or downregulated ( $\log_2$ Fold Change < -0.8,  $p_{adj}$  < 0.05), as determined by DESeq2 analysis are shown in red and blue, respectively. The significance cut-off is indicated with a red bar. Significantly enriched gene ontology (GO) terms of the genes that are significantly upregulated in the absence of Rad6 are shown at the bottom. GO analysis is conducted in PANTHER, GO-Slim Biological Process by using *Saccharomyces cerevisiae* (all genes in database) as reference list and test type as FISHER with FDR correction. Genes that are significantly downregulated in *rad6Δ* cells did not have a significantly enriched GO term.

**(B)** Heatmap showing the RNA-seq expression (rpkm) of redox genes in the WT and *rad6Δ*  $\pm$  peroxide samples. The plotted data shows the average of two RNA-seq replicates. The genes that are differentially expressed (DESeq2,  $p_{adj}$  < 0.05) are indicated with an asterisk (\*).

**(C)** RNA-seq data of ribosomal protein-encoding genes ( $n=148$ , gene names obtained from SGD) in WT vs *rad6Δ* cells  $\pm$  peroxide show that mRNAs that encode ribosomal proteins are lower in *rad6Δ* cells. Average of 2 replicates is shown.

**(D)** Translation efficiency (TE, Ribo-seq reads normalized by RNA-seq reads) of 21 mRNAs that encode redox enzymes shows translational upregulation of these genes in *rad6Δ* vs WT cells in the presence of peroxide. Significance is calculated by one-way ANOVA test. ns = not significant. Average data from 2 replicates were used to compute

TE values. The line in the middle of each box is plotted at the median for the 21 genes and whiskers show the minimum and maximum values.

**(E)** Western blotting demonstrates that the phosphorylation of eIF2 $\alpha$  due to peroxide is minimal in *rad6 $\Delta$  cells in the SUB280 background but is more moderate in the S288C background. Bar chart of means below blot shows quantified results for 4 replicates of S288C data (including the above blot) where loss of *RAD6* consistently results in loss of phosphorylation. This suggests that other inputs regulate eIF2 $\alpha$  phosphorylation in the S288C background. Note that total eIF2 $\alpha$  levels do not change with peroxide and in the different strains.*

**(F)** Bar graphs of mean translation efficiency (left) and RNA levels (right) of GCN1, GCN2, GCN20 genes show that the abundance and translation level of the mRNAs encoding these proteins are not affected by loss of Rad6.

Figure S5

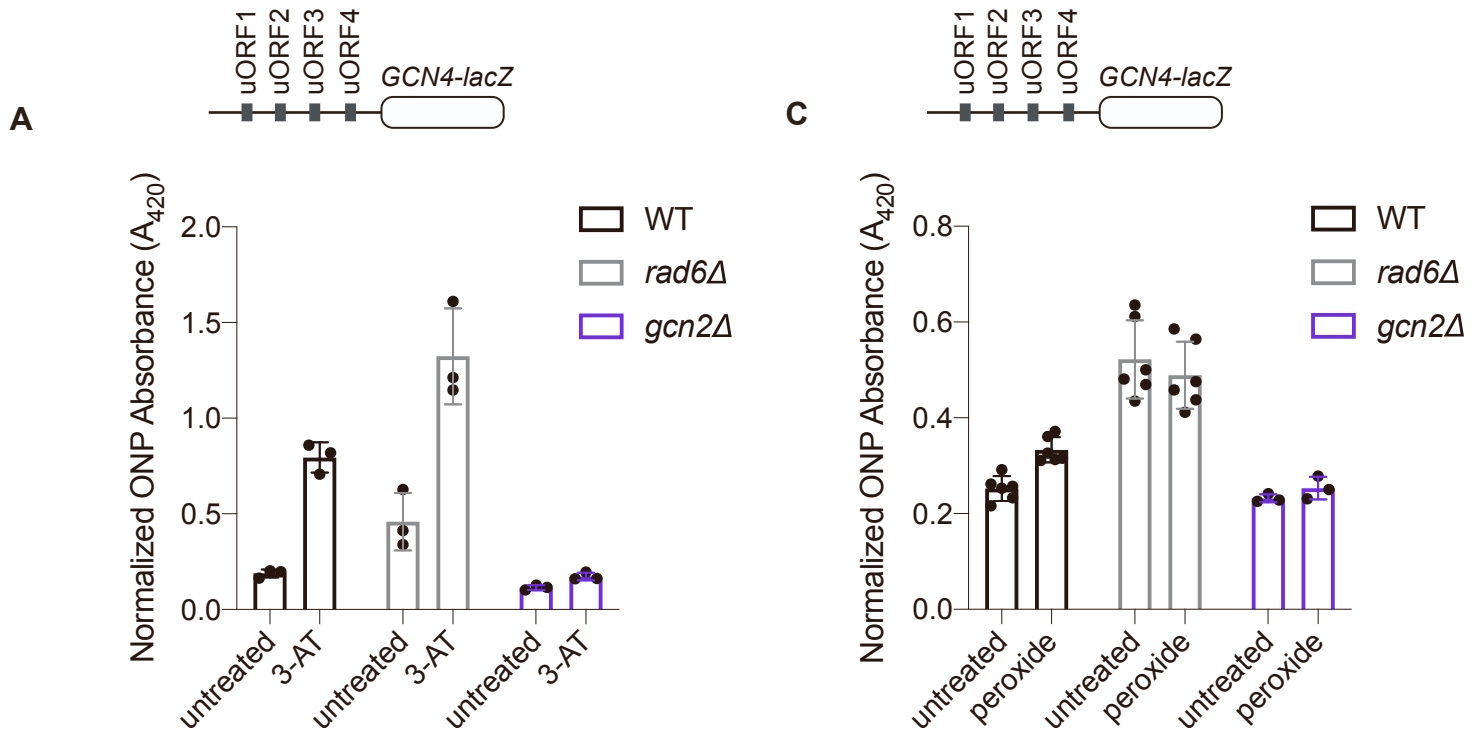

**B Genes coding for initiation factors  
n=31**

- ANB1
- CDC33
- DED1
- FUN12
- GCD1
- GCD10
- GCD11
- GCD14
- GCD2
- GCD6
- GCD7
- GCN3
- HCR1
- HYP2
- NIP1
- NOP6
- PRT1
- RPG1
- SUI1
- SUI2
- SUI3
- TIF1
- TIF11
- TIF2
- TIF3
- TIF34
- TIF35
- TIF4631
- TIF4632
- TIF5
- TIF6

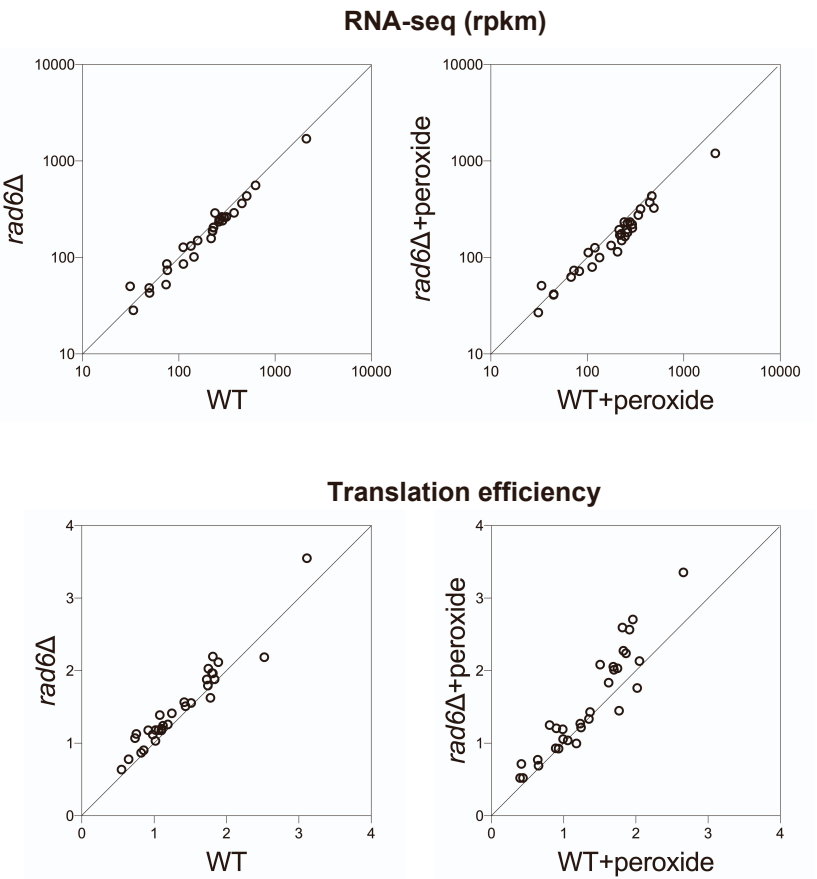

**Figure S5. Supporting *GCN4-lacZ* reporter experiments and analysis of expression of *GCD* genes. Related to Figure 6.**

**(A)** *GCN4-lacZ* assay in the presence of 3-AT shows that *GCN4* translation is induced with 3-AT treatment, and this is dependent on the presence of Gcn2. These positive controls show the proper functioning of the reporter in these cells and also show that Gcn2 remains active in *rad6* $\Delta$  cells. Data from 3 replicates shown. Error bar indicates mean  $\pm$  standard deviation.

**(B)** RNA-seq (top) and translation efficiency (bottom) data corresponding to mRNAs that encode “Gcd” genes indicate that the expression of these genes does not change in the cells lacking Rad6  $\pm$  peroxide. The average of 2 replicates is shown.

**(C)** *GCN4-lacZ* assay performed in the presence of peroxide. The data show that *GCN4* translation is higher in *rad6* $\Delta$  cells compared to WT, with and without peroxide. Data from 3 replicates shown. Error bar indicates mean  $\pm$  standard deviation.

Table S1. Yeast strains used in this study.

| Yeast name                      | Genotype                                                                                                                                                                               | Source |
|---------------------------------|----------------------------------------------------------------------------------------------------------------------------------------------------------------------------------------|--------|
| SUB280 WT                       | <i>MATa lys2-801 leu2-3,112 ura3-52 his3- Δ200 trp1-1[am] ubi1-Δ1::TRP1 ubi2-Δ2::ura3 ubi3-Δub-2 ubi4-Δ2::LEU2 [pUB39 Ub, LYS2][pUB100 Ubi1 tail, HIS3]</i>                            | [S1]   |
| SUB280 <i>rad6Δ</i>             | <i>MATa lys2-801 leu2-3,112 ura3-52 his3- Δ200 trp1-1[am] ubi1-Δ1::TRP1 ubi2-Δ2::ura3 ubi3-Δub-2 ubi4-Δ2::LEU2 [pUB39 Ub, LYS2][pUB100 Ubi1 tail, HIS3] rad6:kanMX4</i>                | [S2]   |
| SUB280 <i>hel2Δ</i>             | <i>MATa lys2-801 leu2-3,112 ura3-52 his3- Δ200 trp1-1[am] ubi1-Δ1::TRP1 ubi2-Δ2::ura3 ubi3-Δub-2 ubi4-Δ2::LEU2 [pUB39 Ub, LYS2][pUB100 Ubi1 tail, HIS3] hel2::kanMX4</i>               | [S3]   |
| SUB280 <i>rad6Δ RAD6</i>        | <i>MATa lys2-801 leu2-3,112 ura3-52 his3- Δ200 trp1-1[am] ubi1-Δ1::TRP1 ubi2-Δ2::ura3 ubi3-Δub-2 ubi4-Δ2::LEU2 [pUB39 Ub, LYS2][pUB100 Ubi1 tail, HIS3] [pYES RAD6-HA, URA3]</i>       | [S4]   |
| SUB280 <i>rad6Δ RAD6 (C88A)</i> | <i>MATa lys2-801 leu2-3,112 ura3-52 his3- Δ200 trp1-1[am] ubi1-Δ1::TRP1 ubi2-Δ2::ura3 ubi3-Δub-2 ubi4-Δ2::LEU2 [pUB39 Ub, LYS2][pUB100 Ubi1 tail, HIS3] [pYES RAD6(C88A)-HA, URA3]</i> | [S4]   |
| S288C WT                        | <i>MATa SUC2 gal2 mal2 mel flo1 flo8-1 hap1 ho bio1 bio6</i>                                                                                                                           | [S5]   |
| S288C <i>rad6Δ</i>              | <i>MATa SUC2 gal2 mal2 mel flo1 flo8-1 hap1 ho bio1 bio6 rad6::kanMX4</i>                                                                                                              | [S6]   |

Table S2. Oligonucleotides and plasmids used in this study.

| Name                                                                                        | Sequence (5' to 3')                                                                                                                                                                                                                                                                                                                            |
|---------------------------------------------------------------------------------------------|------------------------------------------------------------------------------------------------------------------------------------------------------------------------------------------------------------------------------------------------------------------------------------------------------------------------------------------------|
| <b>Gene fragments and oligo used for generating p416-Met25-Rluc-P2A-X-P2A Fluc plasmids</b> |                                                                                                                                                                                                                                                                                                                                                |
| <b>No-Stall (dsDNA)</b>                                                                     | AGAAGATGCACCTGATGAAATGGGAAAATATATCAAATCGTTCGTTGAGCGA<br>GTTCTCAAAAATGAACAAGGAAGCGGAGCTACTAACTTCAGCCTGCTGAAGC<br>AGGCTGGAGACGTGGAGGAGAACCCTGGACCTAAGCTT <b>GAATTCGATATCG</b><br>CGGCCGCTGGAAGCGGAGCAACCAATTTCTCACTATTAACAAGCAGGCGA<br>TGTTGAAGAAAATCCAGGTCCGATGGAAGATGCTAAGAATATTAAGAAAGGA<br>CCAGCTCCTTTCTACCCTCTCGAAGATGGAAGCTGCTGGTGA        |
| <b>6XCGA (dsDNA)</b>                                                                        | AGATGCACCTGATGAAATGGGAAAATATATCAAATCGTTCGTTGAGCGAGTTC<br>TCAAAAATGAACAAGGAAGCGGAGCTACTAACTTCAGCCTGCTGAAGCAGGC<br>TGGAGACGTGGAGGAGAACCCTGGACCTAAGCTT <b>CGACGACGACGACGAC</b><br><b>GAGCGGCCGCTGGAAGCGGAGCAACCAATTTCTCACTATTAACAAGCAGG</b><br>CGATGTTGAAGAAAATCCAGGTCCGATGGAAGATGCTAAGAATATTAAGAAA<br>GGACCAGCTCCTTTCTACCCTCTCGAAGATGGAAGCTGCTGG |
| <b>8xPro (dsDNA)</b>                                                                        | TGCACCTGATGAAATGGGAAAATATATCAAATCGTTCGTTGAGCGAGTTCTCA<br>AAAATGAACAAGGAAGCGGAGCTACTAACTTCAGCCTGCTGAAGCAGGCTGG<br>AGACGTGGAGGAGAACCCTGGACCTAAGCTT <b>CCACCCCGCCTCCACCC</b><br><b>GCCTGCGGCCGCTGGAAGCGGAGCAACCAATTTCTCACTATTAACAAGCA</b><br>GGCGATGTTGAAGAAAATCCAGGTCCGATGGAAGATGCTAAGAATATTAAGA<br>AAGGACCAGCTCCTTTCTACCCTCTCGAAGATGGAAGCTGC    |
| <b>3xPPD (dsDNA)</b>                                                                        | GCACCTGATGAAATGGGAAAATATATCAAATCGTTCGTTGAGCGAGTTCTCAA<br>AATGAACAAGGAAGCGGAGCTACTAACTTCAGCCTGCTGAAGCAGGCTGGA<br>GACGTGGAGGAGAACCCTGGACCTAAGCTT <b>CCACCTGATCCACCTGATCCA</b><br><b>CCTGATGCGGCCGCTGGAAGCGGAGCAACCAATTTCTCACTATTAACAAG</b><br>CAGGCGATGTTGAAGAAAATCCAGGTCCGATGGAAGATGCTAAGAATATTA<br>GAAAGGACCAGCTCCTTTCTACCCTCTCGAAGATGGAAGCT   |
| <b>3xPPE (dsDNA)</b>                                                                        | GCACCTGATGAAATGGGAAAATATATCAAATCGTTCGTTGAGCGAGTTCTCAA<br>AATGAACAAGGAAGCGGAGCTACTAACTTCAGCCTGCTGAAGCAGGCTGGA<br>GACGTGGAGGAGAACCCTGGACCTAAGCTT <b>CCTCCAGAACCTCCAGAACCT</b><br><b>CCAGAAGCGGCCGCTGGAAGCGGAGCAACCAATTTCTCACTATTAACAAG</b><br>CAGGCGATGTTGAAGAAAATCCAGGTCCGATGGAAGATGCTAAGAATATTA<br>GAAAGGACCAGCTCCTTTCTACCCTCTCGAAGATGGAAGCT   |
| <b>3xKIP (ssDNA Oligo)</b>                                                                  | AGACGTGGAGGAGAACCCTGGACCTAAGCTT <b>AAAATTCCGAAAATTCCGAA</b><br><b>AATTCCGGCGGCCGCTGGAAGCGGAGCTACTAACTTCAGCC</b>                                                                                                                                                                                                                                |
| <b>Oligos used for generating northern blot probe</b>                                       |                                                                                                                                                                                                                                                                                                                                                |
| <b>tRNA-Pro-AGG_Fwd</b>                                                                     | GGCGTGTGGTCTAGAGGTATG                                                                                                                                                                                                                                                                                                                          |
| <b>T7_tRNA-Pro-AGG_Rev</b>                                                                  | TAATACGACTCACTATAGGGGAGCCGGGACTCGAACCCGG                                                                                                                                                                                                                                                                                                       |



|                                           |                                                                                                                                              |
|-------------------------------------------|----------------------------------------------------------------------------------------------------------------------------------------------|
| <b>T7_tRNA-Pro-AGG_YCpla c33 (gBlock)</b> | ACCATGATTACGCCAAGCTTGGGCGTGTGGTCTAGAGGTATGATTCTCGCTTAGGGTGC GGGAGGTCCCGGGTTCGAGTCCCGGCTCGCCCCCCTATAGTGAGTCGTATTAGAATCACTGGCCGTCGTTT          |
| <b>RNA size selection markers</b>         |                                                                                                                                              |
| 25mer                                     | rArUrGrUrArCrArCrGrGrArGrUrCrGrArGrCrArCrCrCrGrCrA                                                                                           |
| 34mer                                     | rArUrGrUrArCrArCrGrGrArGrUrCrGrArGrCrArCrCrCrGrCrArArCrGrCrGrArArUrG                                                                         |
| 54mer                                     | rArUrGrUrArCrArCrGrGrArGrUrCrGrArGrCrArCrCrCrGrCrArArCrGrCrGrArArUrGrUrArCrArCrGrGrArGrUrCrGrArGrCrArCrCrCrG                                 |
| 68mer                                     | rArUrGrUrArCrArCrGrGrArGrUrCrGrArGrCrArCrCrCrGrCrArArCrGrCrGrArArUrGrUrArCrArCrGrGrArGrUrCrGrArGrCrArCrCrCrGrCrArArCrGrCrGrArUrGrUrArCrA     |
| 70mer                                     | rArUrGrUrArCrArCrGrGrArGrUrCrGrArCrCrCrGrCrArArCrGrCrGrArUrGrUrArCrArCrGrGrArGrUrCrGrArCrCrCrGrCrArArCrGrCrGrArUrGrUrArCrArCrGrGrArGrUrCrGrA |
| <b>rRNA substraction oligonucleotides</b> |                                                                                                                                              |
| 1b                                        | /5BioTinTEG/GGTGCACAATCGACCGATC                                                                                                              |
| 2b                                        | /5BioTinTEG/GTTTCTTTACTTATTCAATGAAGCGG                                                                                                       |
| 3b                                        | /5BioTinTEG/TATAGATGGATACGAATAAGGCGTC                                                                                                        |
| 4                                         | /5BioTinTEG/TTGTGGCGTCGCTGAACCATAG                                                                                                           |
| 5                                         | /5BioTinTEG/CAGGGGGCATGCCTGTTTGAGCGTCAT                                                                                                      |
| 6                                         | /5BioTinTEG/CGGTGCCCGAGTTGTAATTT                                                                                                             |
| <b>Linker oligonucleotides</b>            |                                                                                                                                              |
| NI-810                                    | 5´-/5Phos/NNNNNATCGTAGATCGGAAGAGCACACGTCTGAA/3ddC/                                                                                           |
| NI-811                                    | 5´-/5Phos/NNNNNAGCTAAGATCGGAAGAGCACACGTCTGAA/3ddC/                                                                                           |
| NI-812                                    | 5´-/5Phos/NNNNNCGTAAAGATCGGAAGAGCACACGTCTGAA/3ddC/                                                                                           |
| NI-813                                    | 5´-/5Phos/NNNNNCTAGAAGATCGGAAGAGCACACGTCTGAA/3ddC/                                                                                           |
| NI-814                                    | 5´-/5Phos/NNNNNGATCAAGATCGGAAGAGCACACGTCTGAA/3ddC/                                                                                           |
| NI-815                                    | 5´-/5Phos/NNNNNGCATAAGATCGGAAGAGCACACGTCTGAA/3ddC/                                                                                           |
| <b>RT primer</b>                          |                                                                                                                                              |
| NI-802                                    | 5´-/5Phos/NNAGATCGGAAGAGCGTCGTGTAGGGAAAGAG/iSp18/GTGACTGGAGTTCAGACGTGTGCTC                                                                   |
| <b>PCR primers</b>                        |                                                                                                                                              |
| NI-NI-798                                 | 5´-AATGATACGGCGACCACCGAGATCTACACTCTTTCCCTACACGACGCTC                                                                                         |
| NI-799                                    | 5´-CAAGCAGAAGACGGCATAACGAGATCGTGATGTGACTGGAGTTCAGACGTGTG                                                                                     |
| NI-822                                    | 5´-CAAGCAGAAGACGGCATAACGAGATACATCGGTGACTGGAGTTCAGACGTGTG                                                                                     |

|                    |                                                                  |                                                              |                  |
|--------------------|------------------------------------------------------------------|--------------------------------------------------------------|------------------|
| NI-823             | 5'-<br>CAAGCAGAAGACGGCATAACGAGATGCCTAAGTGACTGGAGTTCAGACGTGT<br>G |                                                              |                  |
| NI-824             | 5'-<br>CAAGCAGAAGACGGCATAACGAGATTGGTCAGTGACTGGAGTTCAGACGTGT<br>G |                                                              |                  |
| NI-825             | 5'-<br>CAAGCAGAAGACGGCATAACGAGATCACTGTGTGACTGGAGTTCAGACGTGTG     |                                                              |                  |
| <b>Plasmids</b>    |                                                                  |                                                              |                  |
| <b>Plasmid No.</b> | <b>Vector</b>                                                    | <b>Gene</b>                                                  | <b>Reference</b> |
| p028               | pYES 2.0                                                         | <i>RAD6</i>                                                  | [S4]             |
| p032               | pYES 2.0                                                         | <i>RAD6</i> (C88S)                                           | [S4]             |
| p116               | pYES 2.0                                                         | <i>RAD6</i> (C88A)                                           | [S4]             |
| p149               | p180                                                             | <i>Gcn4-LacZ</i> (4 uORFs)                                   | [S7]             |
| p150               | p227                                                             | <i>Gcn4-LacZ</i> (uORFless)                                  | [S8]             |
| p222               | p416 (Met25p)                                                    | Rluc-P2A-NoStall-P2A-Fluc                                    | This study       |
| p223               | p416 (Met25p)                                                    | Rluc-P2A-3xKIP-P2A-Fluc                                      | This study       |
| p250               | p416 (Met25p)                                                    | Rluc-P2A-6xCGA-P2A-Fluc                                      | This study       |
| p255               | pM199Z                                                           | <i>Gcn4-LacZ</i> (uORF1 only)                                | [S9]             |
| p256               | pM226Z                                                           | <i>Gcn4-LacZ</i> (uORF1 extended to<br><i>GCN4</i> main ORF) | [S9]             |
| p259               | p416 (Met25p)                                                    | Rluc-P2A-8xPro-P2A-Fluc                                      | This study       |
| p261               | p416 (Met25p)                                                    | Rluc-P2A-3xPPD-P2A-Fluc                                      | This study       |
| p262               | p416 (Met25p)                                                    | Rluc-P2A-3xPPE-P2A-Fluc                                      | This study       |

Table S3. Ribosome profiling statistics.

| Sample name | Description                                      | Data type | Reads aligned to non-coding RNA | Not aligned to non-coding RNA | Reads without PCR duplicates | Aligned to coding regions and splice junctions |
|-------------|--------------------------------------------------|-----------|---------------------------------|-------------------------------|------------------------------|------------------------------------------------|
| SM061F      | SUB280 WT_rep1                                   | Ribo-seq  | 88,465,576                      | 32,310,998                    | 21,072,905                   | 16,214,578                                     |
| SM071F      | SUB280 WT_rep2                                   | Ribo-seq  | 81,035,725                      | 41,623,662                    | 29,668,687                   | 24,022,020                                     |
| SM062F      | SUB280 WT+peroxide_rep1                          | Ribo-seq  | 106,692,905                     | 28,338,349                    | 18,298,626                   | 13,749,540                                     |
| SM072F      | SUB280 WT+peroxide_rep2                          | Ribo-seq  | 78,751,014                      | 26,997,840                    | 19,255,686                   | 15,370,434                                     |
| SM065F      | SUB280 <i>rad6</i> Δ_rep1                        | Ribo-seq  | 91,450,355                      | 32,530,594                    | 13,938,148                   | 10,430,067                                     |
| SM075F      | SUB280 <i>rad6</i> Δ_rep2                        | Ribo-seq  | 102,956,589                     | 43,203,482                    | 30,983,491                   | 24,965,084                                     |
| SM066F      | SUB280 <i>rad6</i> Δ+peroxide_rep1               | Ribo-seq  | 83,007,104                      | 20,487,638                    | 8,791,438                    | 6,516,848                                      |
| SM076F      | SUB280 <i>rad6</i> Δ+peroxide_rep2               | Ribo-seq  | 83,266,747                      | 28,388,419                    | 20,644,308                   | 17,042,575                                     |
| SM099F      | SUB280 <i>hel2</i> Δ                             | Ribo-seq  | 51,976,975                      | 19,589,386                    | 17,383,785                   | 13,504,129                                     |
| SM100F      | SUB280 <i>hel2</i> Δ+peroxide                    | Ribo-seq  | 39,728,199                      | 17,108,518                    | 15,205,421                   | 10,719,351                                     |
| SM103F      | SUB280 <i>rad6</i> Δ <i>RAD6</i>                 | Ribo-seq  | 40,183,394                      | 26,152,266                    | 20,545,187                   | 15,387,454                                     |
| SM104F      | SUB280 <i>rad6</i> Δ <i>RAD6</i> +peroxide       | Ribo-seq  | 38,330,665                      | 16,932,848                    | 13,310,052                   | 10,124,867                                     |
| SM105F      | SUB280 <i>rad6</i> Δ <i>RAD6</i> (C88A)          | Ribo-seq  | 73,490,623                      | 39,788,606                    | 30,908,395                   | 24,485,828                                     |
| SM106F      | SUB280 <i>rad6</i> Δ <i>RAD6</i> (C88A)+peroxide | Ribo-seq  | 46,123,764                      | 21,249,347                    | 16,905,721                   | 13,384,694                                     |
| SM107F      | S288C WT                                         | Ribo-seq  | 43,906,581                      | 18,322,535                    | 15,662,623                   | 11,286,980                                     |

|         |                                    |            |             |            |            |            |
|---------|------------------------------------|------------|-------------|------------|------------|------------|
| SM108F  | S288C WT+peroxide                  | Ribo-seq   | 46,024,866  | 10,218,846 | 8,698,065  | 6,022,004  |
| SM109F  | S288C <i>rad6</i> Δ                | Ribo-seq   | 76,335,435  | 27,695,810 | 23,610,645 | 17,854,558 |
| SM110F  | S288C <i>rad6</i> Δ+peroxide       | Ribo-seq   | 10,886,937  | 3,519,792  | 3,057,926  | 2,286,614  |
| SM061Fd | SUB280 WT_rep1                     | Disome-seq | 7,761,659   | 5,475,884  | 3,524,369  | 964,664    |
| SM071Fd | SUB280 WT_rep2                     | Disome-seq | 51,196,443  | 30,402,393 | 5,154,631  | 2,895,728  |
| SM062Fd | SUB280 WT+peroxide_rep1            | Disome-seq | 6,670,378   | 5,794,983  | 3,619,232  | 1,318,655  |
| SM072Fd | SUB280 WT+peroxide_rep2            | Disome-seq | 31,647,008  | 37,880,232 | 6,159,970  | 3,965,524  |
| SM065Fd | SUB280 <i>rad6</i> Δ               | Disome-seq | 6,889,699   | 7,241,843  | 2,174,826  | 1,285,476  |
| SM066Fd | SUB280 <i>rad6</i> Δ+peroxide      | Disome-seq | 4,596,077   | 7,346,885  | 2,800,625  | 733,394    |
| SM061M  | SUB280 WT_rep1                     | RNA-seq    | 72,941,175  | 34,744,878 | 24,913,881 | 16,298,506 |
| SM071M  | SUB280 WT_rep2                     | RNA-seq    | 68,143,036  | 26,850,953 | 20,027,139 | 11,889,363 |
| SM062M  | SUB280 WT+peroxide_rep1            | RNA-seq    | 61,818,591  | 26,895,510 | 19,329,586 | 12,833,259 |
| SM072M  | SUB280 WT+peroxide_rep2            | RNA-seq    | 73,905,111  | 26,350,153 | 19,532,817 | 11,208,925 |
| SM065M  | SUB280 <i>rad6</i> Δ_rep1          | RNA-seq    | 100,532,895 | 34,833,857 | 24,941,388 | 15,815,962 |
| SM075M  | SUB280 <i>rad6</i> Δ_rep2          | RNA-seq    | 68,204,722  | 23,096,946 | 16,515,446 | 8,793,155  |
| SM066M  | SUB280 <i>rad6</i> Δ+peroxide_rep1 | RNA-seq    | 146,467,948 | 40,302,699 | 29,535,984 | 15,823,150 |
| SM076M  | SUB280 <i>rad6</i> Δ+peroxide_rep2 | RNA-seq    | 81,834,980  | 20,039,453 | 14,121,673 | 7,496,153  |

## BIBLIOGRAPHY

- [S1] Finley, D., Sadis, S., Monia, B.P., Boucher, P., Ecker, D.J., Crooke, S.T., and Chau, V. (1994). Inhibition of proteolysis and cell cycle progression in a multiubiquitination-deficient yeast mutant. *Mol Cell Biol* *14*, 5501-5509. 10.1128/mcb.14.8.5501-5509.1994
- [S2] Silva, G.M., Finley, D., and Vogel, C. (2015). K63 polyubiquitination is a new modulator of the oxidative stress response. *Nat Struct Mol Biol* *22*, 116-123. 10.1038/nsmb.2955
- [S3] Back, S., Gorman, A.W., Vogel, C., and Silva, G.M. (2019). Site-Specific K63 Ubiquitinomics Provides Insights into Translation Regulation under Stress. *J Proteome Res* *18*, 309-318. 10.1021/acs.jproteome.8b00623
- [S4] Simoes, V., Cizubu, B.K., Harley, L., Zhou, Y., Pajak, J., Snyder, N.A., Bouvette, J., Borgnia, M.J., Arya, G., Bartesaghi, A., and Silva, G.M. (2022). Redox-sensitive E2 Rad6 controls cellular response to oxidative stress via K63-linked ubiquitination of ribosomes. *Cell Rep* *39*, 110860. 10.1016/j.celrep.2022.110860.
- [S5] Mortimer, R.K., and Johnston, J.R. (1986). Genealogy of principal strains of the yeast genetic stock center. *Genetics* *113*, 35-43. 10.1093/genetics/113.1.35.
- [S6] Winzeler, E.A., Shoemaker, D.D., Astromoff, A., Liang, H., Anderson, K., Andre, B., Bangham, R., Benito, R., Boeke, J.D., Bussey, H., et al. (1999). Functional characterization of the *S. cerevisiae* genome by gene deletion and parallel analysis. *Science* *285*, 901-906. 10.1126/science.285.5429.901.
- [S7] Hinnebusch, A.G. (1985). A hierarchy of trans-acting factors modulates translation of an activator of amino acid biosynthetic genes in *Saccharomyces cerevisiae*. *Mol Cell Biol* *5*, 2349-2360. 10.1128/mcb.5.9.2349-2360.1985.
- [S8] Mueller, P.P., and Hinnebusch, A.G. (1986). Multiple upstream AUG codons mediate translational control of GCN4. *Cell* *45*, 201-207. 10.1016/0092-8674(86)90384-3.
- [S9] Grant, C.M., Miller, P.F., and Hinnebusch, A.G. (1994). Requirements for intercistronic distance and level of eukaryotic initiation factor 2 activity in reinitiation on GCN4 mRNA vary with the downstream cistron. *Mol Cell Biol* *14*, 2616-2628. 10.1128/mcb.14.4.2616-2628.1994.
